# Supplementary material
Source: PubMed Central journal article supplement (PMC4313413)
Supplement: Supp_Figure1.pdf [file Supp_Figure1.pdf]

## Supplementary Data

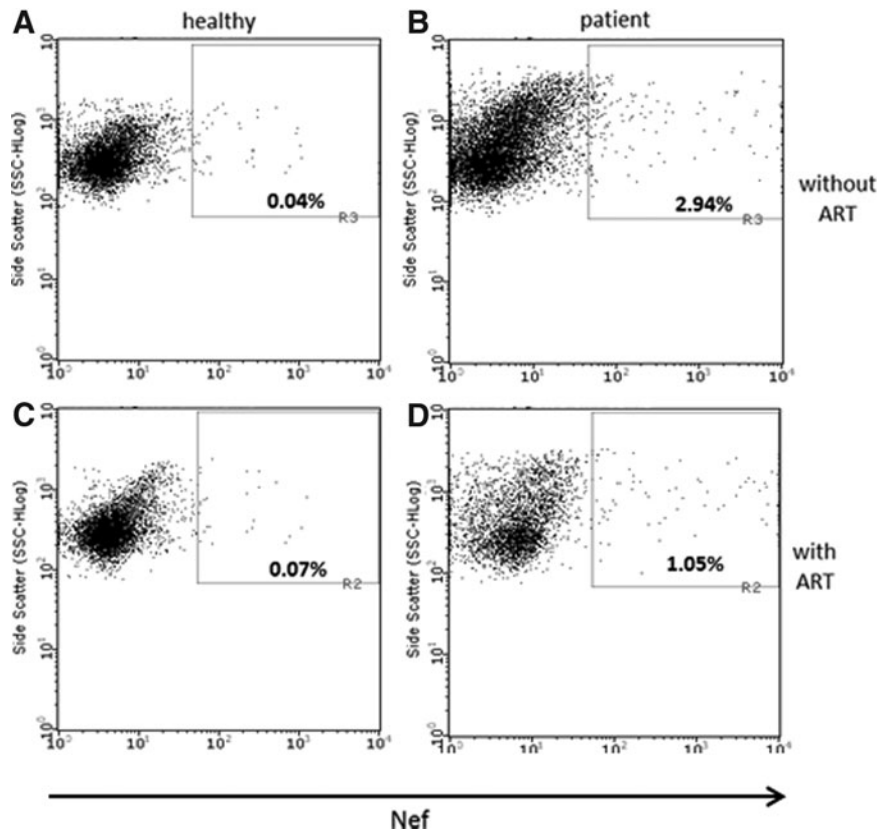

**SUPPLEMENTARY FIG. S1.** Detection of Nef in PBMCs. Dot plots of Nef staining in healthy controls (A, C), viremic HIV patients (B), and HIV patients on ART (D). Nef positive PBMCs were gated based on healthy control sample.
