# Supplementary material
Source: PubMed Central journal article supplement (PMC4313413)
Supplement: Supp_Figure2.pdf [file Supp_Figure2.pdf]

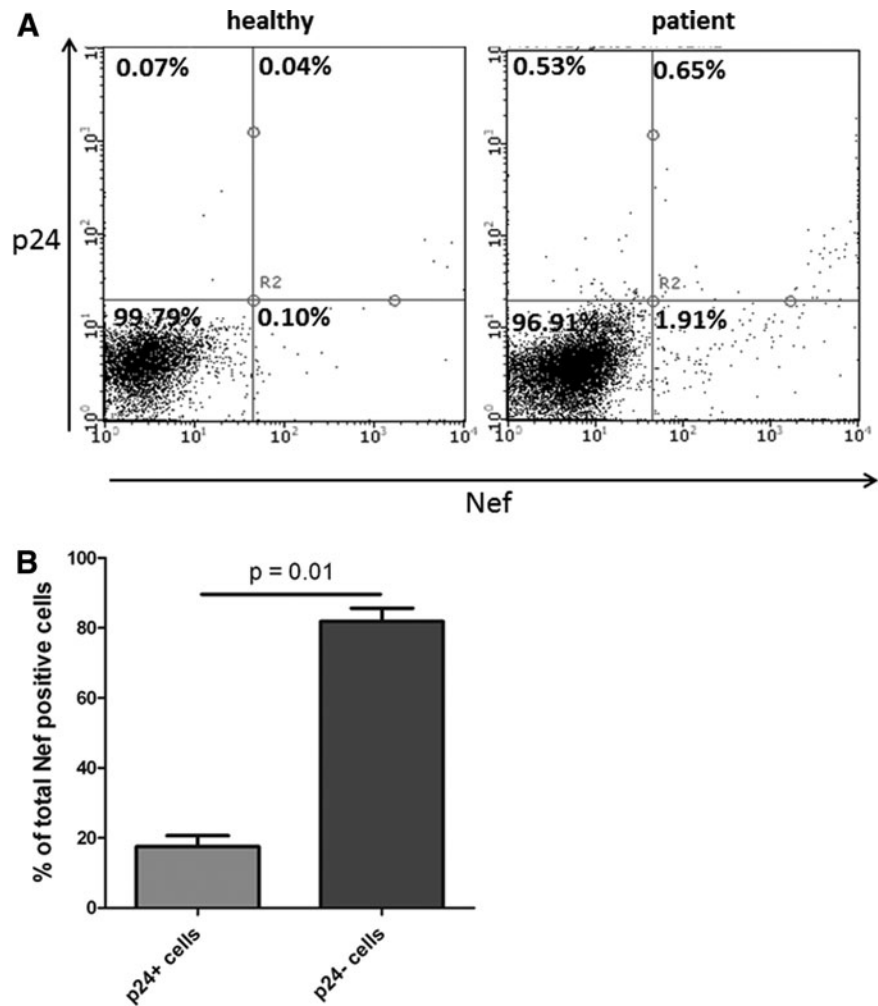

**SUPPLEMENTARY FIG. S2.** Detection of Nef in uninfected HIV-p24-negative cells. **(A)** Dot plots of p24 and Nef costaining in healthy control and viremic HIV patients. Shown are p24 negative/Nef negative (LL), p24 positive/Nef negative (UL), p24 positive/Nef positive (UR), and p24 negative/Nef positive (LR). **(B)** Quantification of the percent of total Nef-positive cells, which are p24 positive and p24 negative. Data represent the mean  $\pm$  SD from three patients.
